# Supplementary material for: Highly conductive chemically converted graphene prepared from mildly oxidized graphene oxide
Source: Royal Society of Chemistry journal article supplement (doi:10.1039/c1jm10768b), 2011-01-01
Supplement: c1jm10768b.pdf [file c1jm10768b.pdf]

## Supporting Information

### Highly Conductive Chemically Converted Graphene Prepared from Mildly Oxidized Graphene Oxide

*Yuxi Xu, Kaixuan Sheng, Chun Li, and Gaoquan Shi\**

Department of Chemistry, Tsinghua University, Beijing 100084, People's Republic of  
China

E-mail: [gshi@tsinghua.edu.cn](mailto:gshi@tsinghua.edu.cn)

#### Figures and Tables

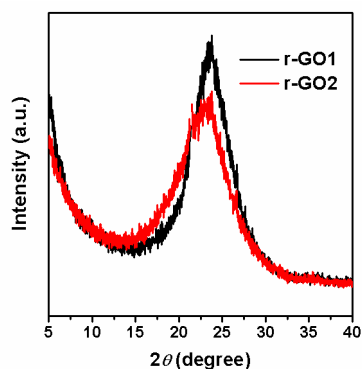

**Figure S1.** XRD patterns of r-GO1 and r-GO2 prepared by hydrazine reduction.

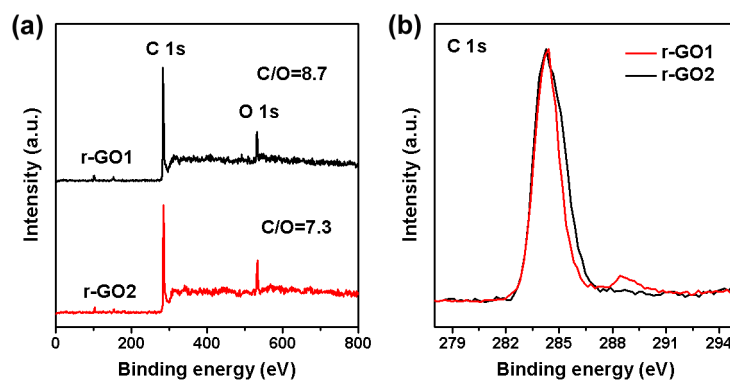

**Figure S2.** (a) XPS survey and (b) C 1s XPS spectra of r-GO1 and r-GO2 prepared by hydrazine reduction.

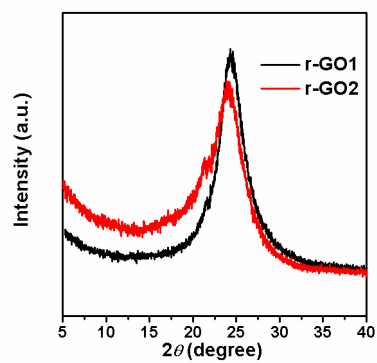

**Figure S3.** XRD patterns of r-GO1 and r-GO2 prepared by HI acid reduction.

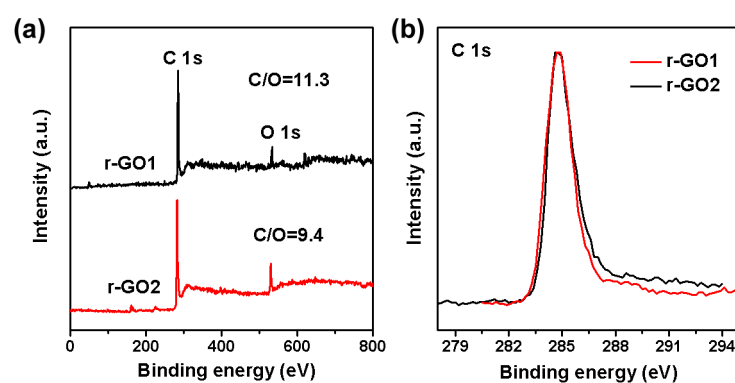

**Figure S4.** (a) XPS survey and (b) C 1s XPS spectra of r-GO1 and r-GO2 prepared by HI acid reduction.

**Table S1.** Comparison of the electrical conductivities of representative chemically converted graphene prepared by various reduction methods.

| Reference        | Reduction method                                                                                                                      | Graphene form               | Electrical conductivity (S/cm)                               |
|------------------|---------------------------------------------------------------------------------------------------------------------------------------|-----------------------------|--------------------------------------------------------------|
| 1                | Hydrazine reduction in ammonia solution                                                                                               | Free-standing paper         | 72<br>118 (annealing at 220 °C)<br>351 (annealing at 500 °C) |
| 2                | HI acid reduction of GO                                                                                                               | Free-standing paper         | 298                                                          |
| 3                | Hydrazine reduced GO                                                                                                                  | Powder                      | 2                                                            |
| 4                | Hydrazine reduction of noncovalent functionalized GO                                                                                  | Free-standing paper         | 2                                                            |
| 5                | Reduction of GO by NaBH <sub>4</sub>                                                                                                  | Transparent conductive film | 0.045                                                        |
| 6                | Pre-reduction of GO by NaBH <sub>4</sub> --Sulphonation--Post reduction with hydrazine                                                | Thin film                   | 12                                                           |
| 7                | Flash reduction of GO                                                                                                                 | Free-standing paper         | 10                                                           |
| 8                | Hydrazine reduction of GO in DMF/water mixture                                                                                        | Free-standing paper         | 17 (air dried)<br>160 (annealing at 150 °C)                  |
| 9                | Hydrazine reduction of KOH modified GO                                                                                                | Free-standing paper         | 6.9                                                          |
| 10               | Thermal annealing at 1100 °C in ultra high vacuum                                                                                     | Transparent conductive film | ~10 <sup>3</sup>                                             |
| 11               | Thermal annealing at 1100 °C in Ar and/or H <sub>2</sub>                                                                              | Transparent conductive film | 550 for 10 nm film<br>727 for 30 nm film                     |
| 12               | Pre-reduction of GO by NaBH <sub>4</sub> --Heating in H <sub>2</sub> SO <sub>4</sub> --Post annealing at 1100 °C in Ar/H <sub>2</sub> | Powder                      | 202                                                          |
| 13               | Rapid heating of GO up to 1050 °C                                                                                                     | Powder                      | 10~23                                                        |
| The present work | Hydrazine reduction of mildly oxide graphene                                                                                          | Free-standing paper         | 169                                                          |
|                  | HI acid reduction of mildly oxide graphene                                                                                            | Free-standing paper         | 405                                                          |

## References

1. Li, D.; Muller, M. B.; Gilje, S.; Kaner, R. B.; Wallace, G. G. Processable Aqueous Dispersions of Graphene Nanosheets. *Nat. Nanotech.* **2008**, *3*, 101–105.
2. Pei, S. F.; Zhao, J. P.; Du, J. H.; Ren, W. C.; Cheng, H. M. Direct Reduction of Graphene Oxide Films *Carbon* **2010**, *48*, 4466–4474.
3. Stankovich, S.; Dikin, D. A.; Piner, R. D.; Kohlhaas, K. A.; Kleinhammes, A.; Jia, Y.; Wu, Y.; Nguyen, S. T.; Ruoff, R. S. Synthesis of Graphene-based Nanosheets via Chemical Reduction of Exfoliated Graphite Oxide. *Carbon* **2007**, *45*, 1558–1565.
4. Xu, Y. X.; Bai, H.; Lu, G. W.; Li, C.; Shi, G. Q. Flexible Graphene Films via the Filtration of Water-Soluble Noncovalent Functionalized Graphene Sheets. *J. Am. Chem. Soc.* **2008**, *130*, 5856–5857.
5. Shin, H.-J.; Kim, K. K.; Benayad, A.; Yoon, S.-M.; Park, H. K.; Jung, I.-S.; Jin, M. H.; Jeong, H.-K.; Kim, J. M.; Choi, J.-Y.; Lee, Y. H. Efficient Reduction of Graphite Oxide by Sodium Borohydride and Its Effect on Electrical Conductance. *Adv. Func. Mater.* **2009**, *19*, 1987–1992.
6. Si, Y.; Samulski, E. T. Synthesis of Water Soluble Graphene. *Nano Lett.* **2008**, *8*, 1679–1682.
7. Cote, L. J.; Cruz-Silva, R.; Huang, J. Flash Reduction and Patterning of Graphite Oxide and Its Polymer Composite. *J. Am. Chem. Soc.* **2009**, *131*, 11027–11032.
8. Park, S.; An, J. H.; Jung, I. W.; Piner, R. D.; An, S. J.; Li, X. S.; Velamakanni, A.; Ruoff, R. S. Colloidal Suspensions of Highly Reduced Graphene Oxide in a Wide

- Variety of Organic Solvents. *Nano Lett.* **2009**, *9*, 1593–1597.
9. Park, S.; An, J. H.; Piner, R. D.; Jung, I.; Yang, D. X.; Velamakanni, A.; Nguyen, S. T.; Ruoff, R. S. Aqueous Suspension and Characterization of Chemically Modified Graphene Sheets. *Chem. Mater.* **2008**, *20*, 6592–6594.
  10. Becerril HA, Mao J, Liu Z, Stoltenberg RM, Bao Z, Chen Y. Evaluation of Solution-Processed Reduced Graphene Oxide Films as Transparent Conductors. *ACS Nano* **2008**, *2*, 463–470.
  11. Wang, X.; Zhi, L.; Müllen, K. Transparent, Conductive Graphene Electrodes for Dye-Sensitized Solar Cells. *Nano Lett.* **2008**, *8*, 323–327.
  12. Gao, W.; Alemany, L. B.; Ci, L.; Ajayan, P. M. New Insights into the Structure and Reduction of Graphite Oxide. *Nat. Chem.* **2009**, *1*, 403–408.
  13. Schniepp, H. C.; Li, J. L.; McAllister, M. J.; Sai, H.; Herrera-Alonso, M.; Adamson, D. H.; Prud'homme, R. K.; Car, R.; Saville, D. A.; Aksay, I. A. Functionalized Single Graphene Sheets Derived from Splitting Graphite Oxide. *J. Phys. Chem. B* **2006**, *110*, 8535–8539.
